# Supplementary material for: Cortical Modulations Increase in Early Sessions with Brain-Machine Interface
Source: PLoS One. 2007 Jul 18;2(7):e619. doi: 10.1371/journal.pone.0000619 (PMC1919433; doi:10.1371/journal.pone.0000619)
Supplement: Text S1 — Variance analysis: variance relationship in signal dependent additive noise (0.03 MB DOC) [file pone.0000619.s001.doc]

**Variance relationship in signal dependent additive noise**

For large rates the Poisson process can be approximated by a Normal distribution with probability density function . This can be decomposed into a signal and signal-dependent noise term as:, where the probability distribution of the noise is conditionally normal with signal dependent variance: . Here we extend this model to consider cases where the variance of the noise is proportional, but not necessarily equal to the signal, i.e., where .

As the signal changes with time so does the variance of the noise and the resulting spike-counts. The variance of the spike counts is given by:

Considering each of these terms we have:

Finally, since for any signal level the error is zero mean,

Thus, the variance of the binned spike counts is given by: .
